# Supplementary material for: A prospective diagnostic evaluation of accuracy of self-taken and healthcare worker-taken swabs for rapid COVID-19 testing
Source: medRxiv preprint, doi:10.1101/2021.12.06.21267356, version 1 (2021-12-07)

**Appendix:**


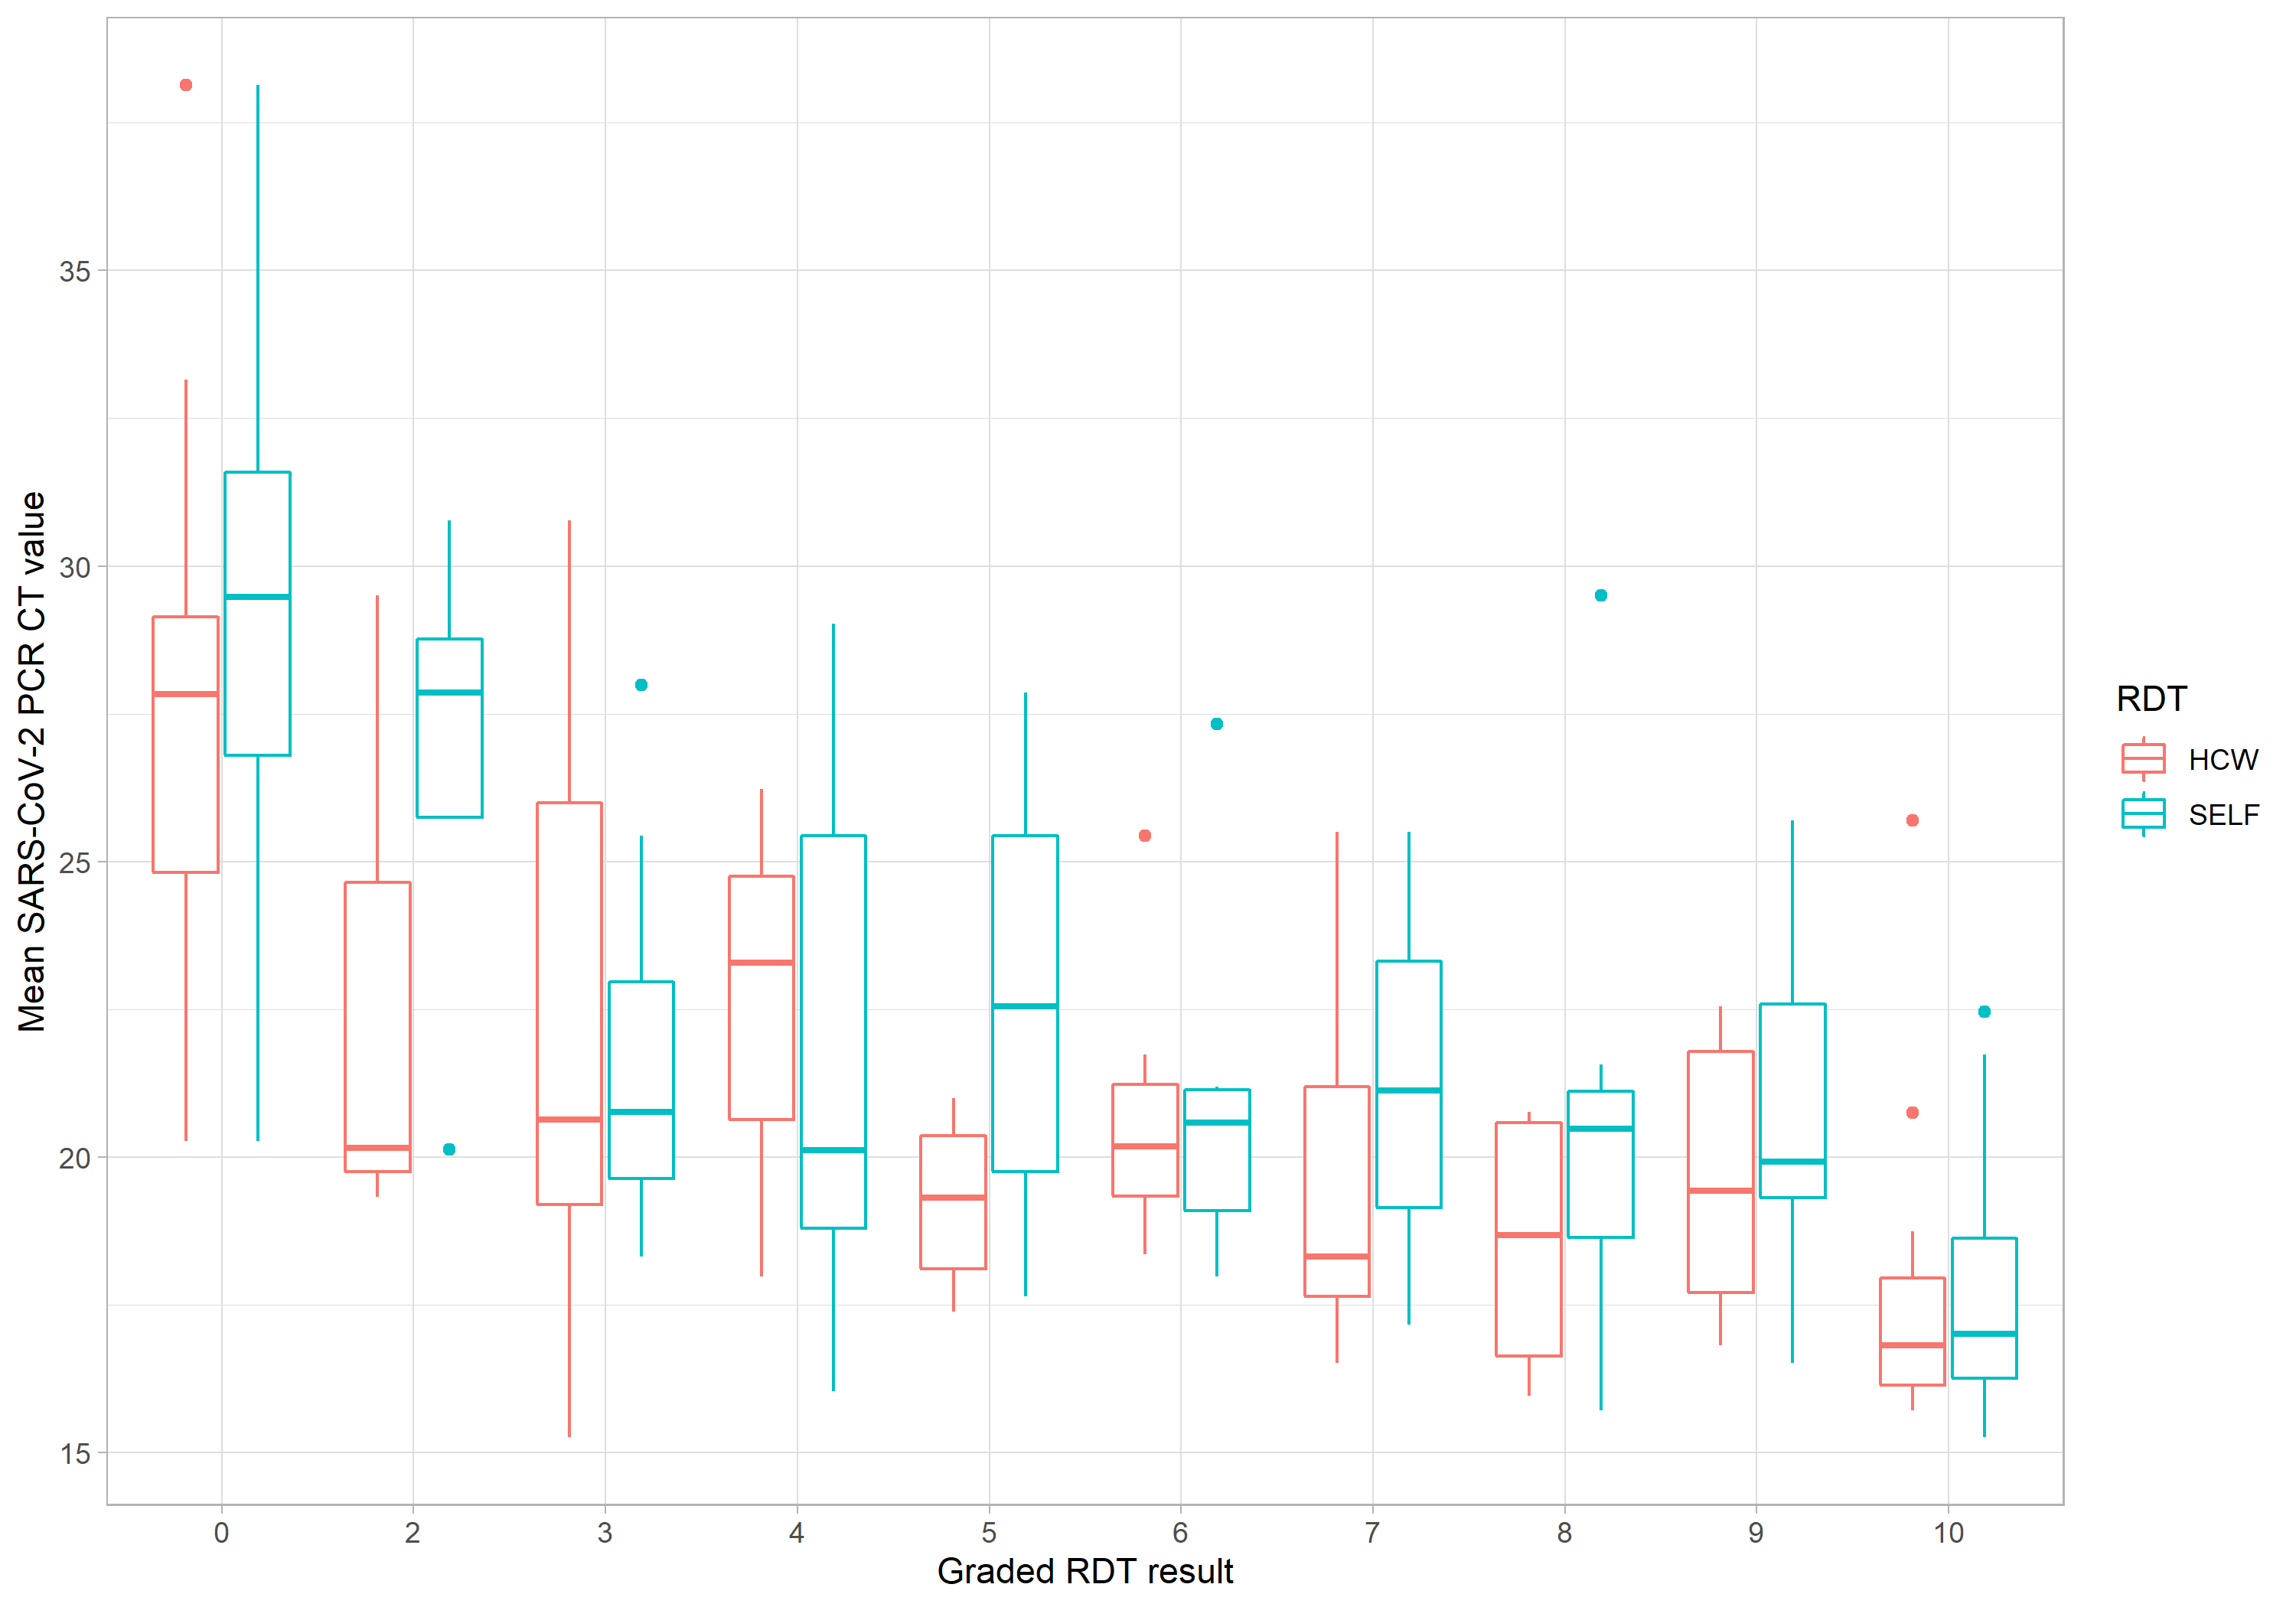
 A box plot comparing self-taken and healthcare worker taken swabs tested by Covios® RDT by mean PCR CT value.

Self-taken and HCW taken Covios® Ag RDT results by RT-PCR CT range.


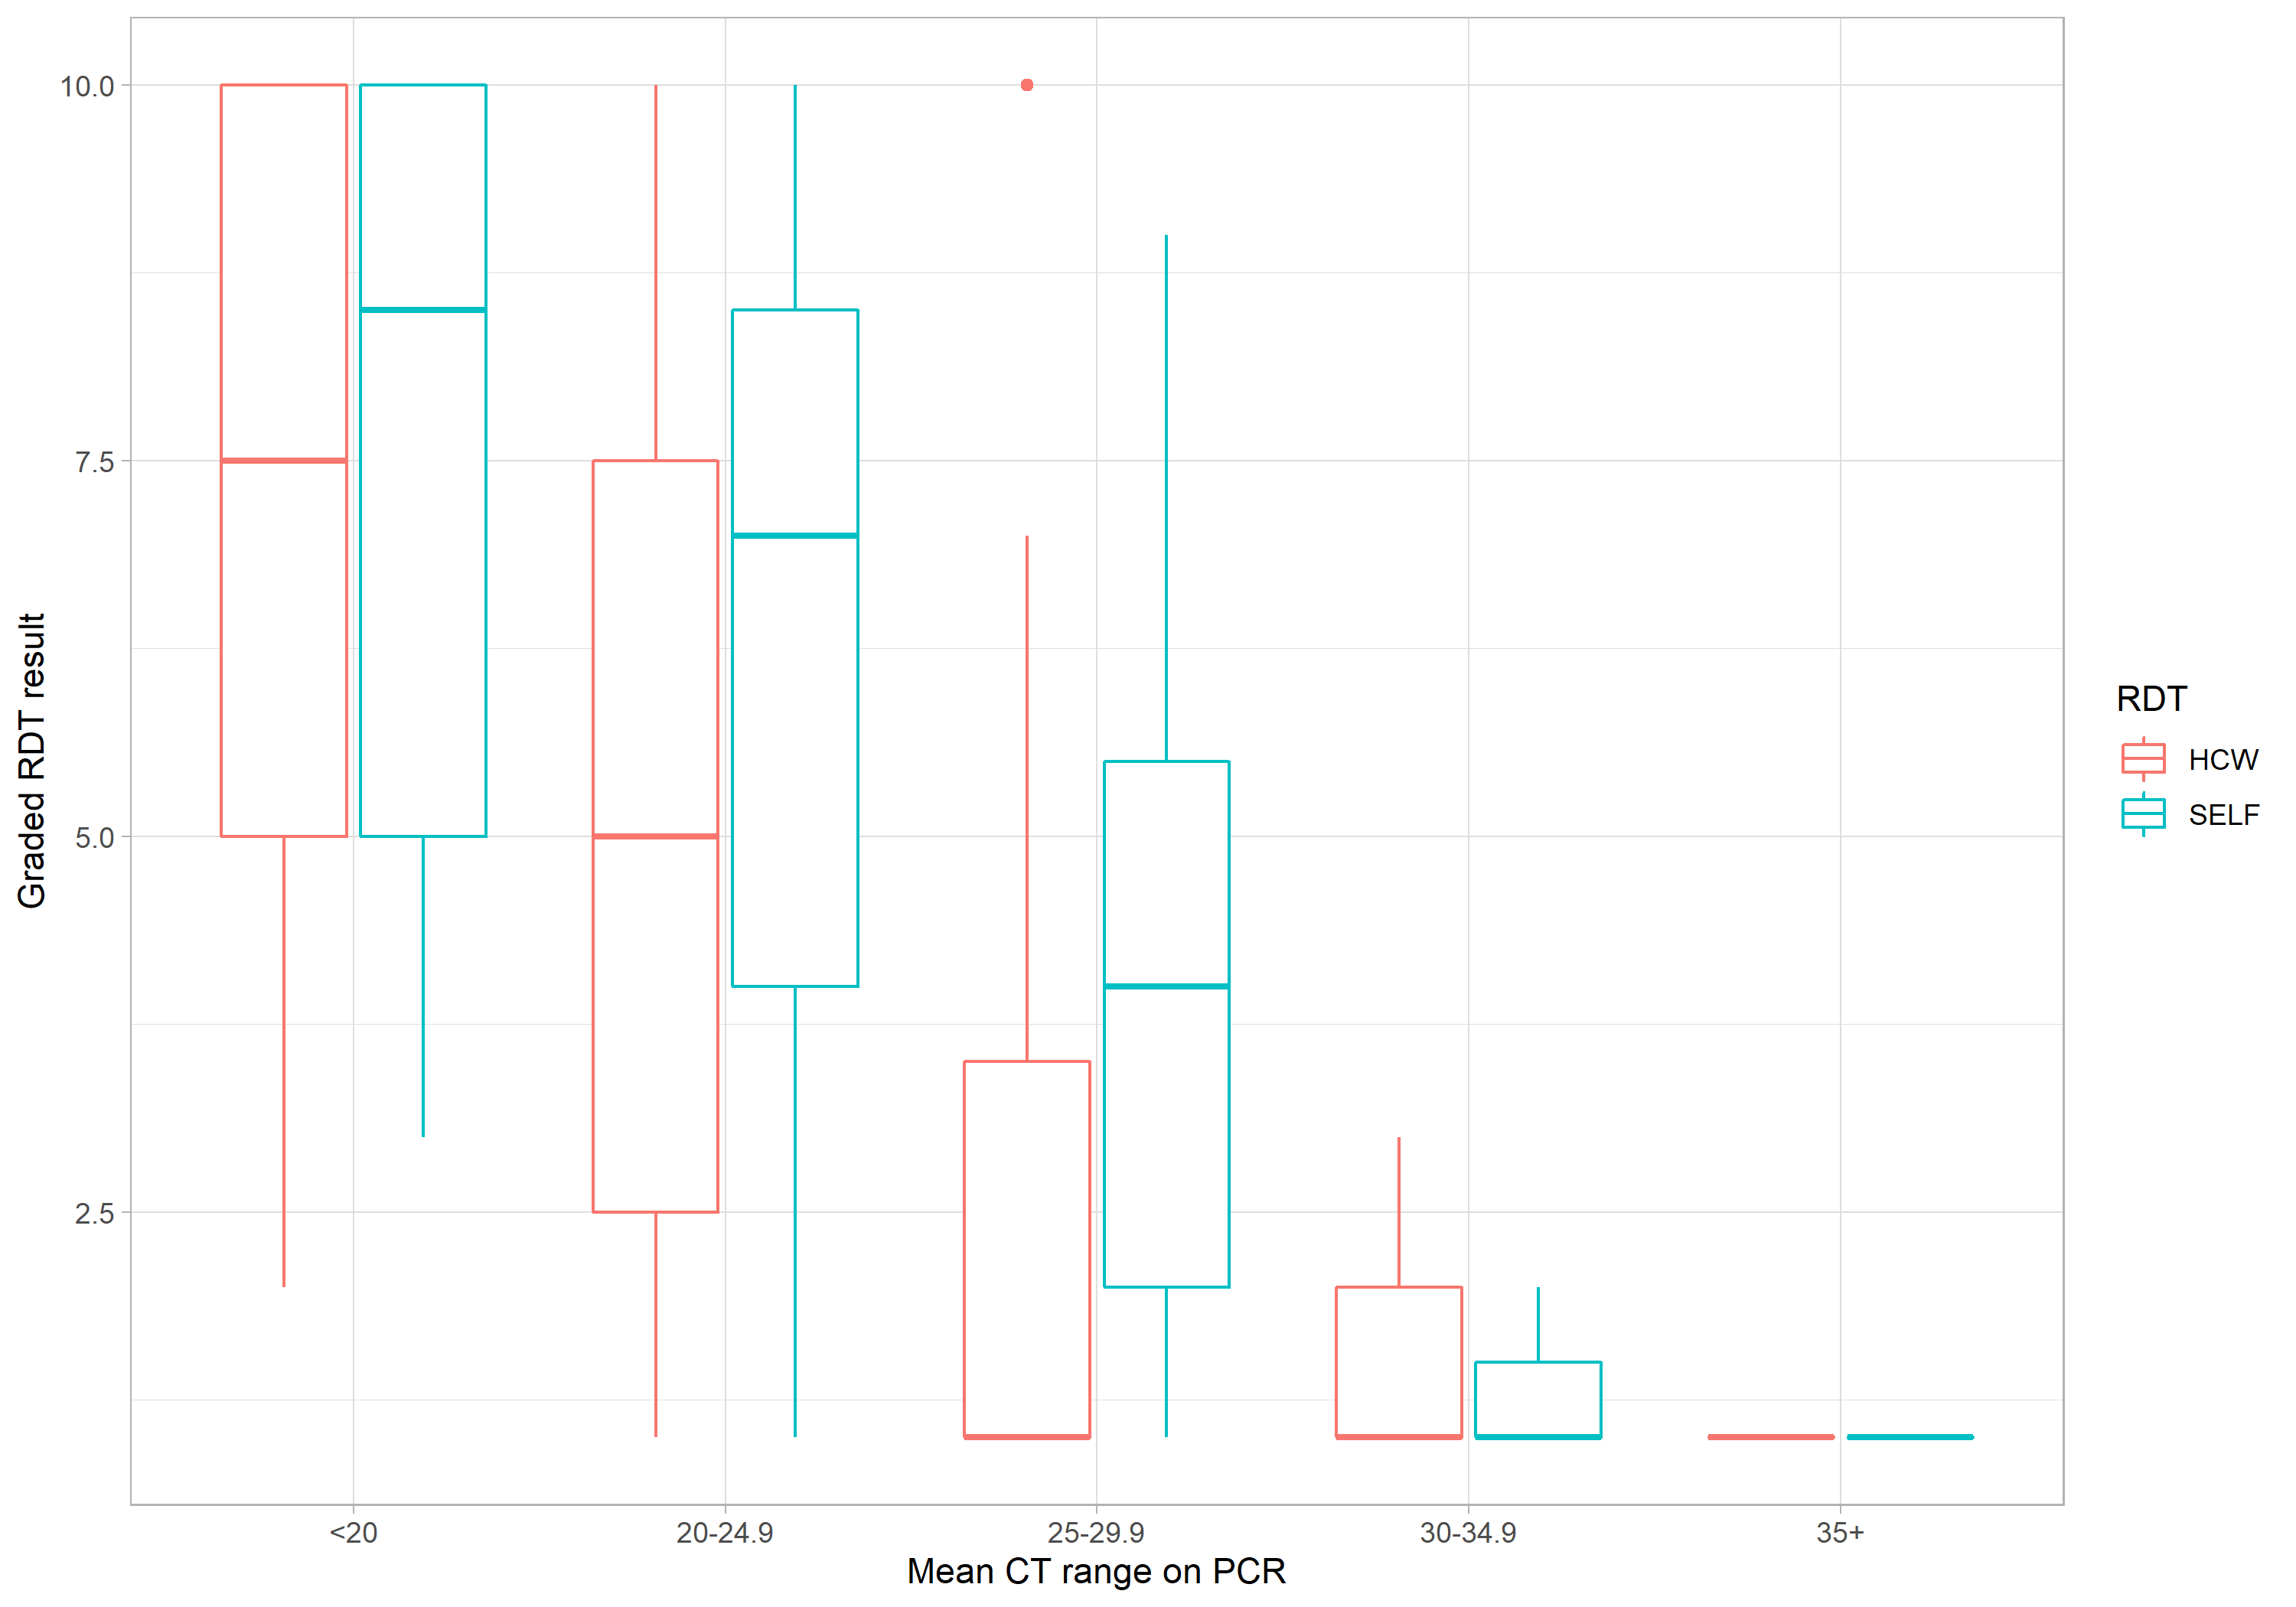

Supplement: Appedix Additional graphs [file 267356_file05.docx]
